# Supplementary material
Source: publisher site journal article supplement (https://www.dovepress.com/article/398168)
Supplement: Supplementary file 1 [file get_supplementary_file.php]

**- SUPPLEMENTARY INFORMATION -**

**Table S1.** List of Independent Ethics Committees or Institutional Review Boards (plus the name of the committee chair). The original IEC approval letters are stored in the TMF and are available on request.

|  | **Site**  **number** | **EC name original** | **EC name English** | **Chair person and EC address** |
| --- | --- | --- | --- | --- |
|  |
|  | **HUNGARY** | |  |  |
|  | All | Egészségügyi | Medical Research | Dr. Zsuzsanna Fürst |
|  |  | Tudományos Tanács | Council Ethics | Széchenyi István tér 7-8. |
|  |  | Klinikai Farmakológiai | Committee for | 1051 Budapest, Hungary |
|  |  | Etikai Bizottság | Clinical Pharmacology |  |
|  | **LITHUANIA** | |  |  |
|  | All | Lietuvos bioetikos | Lithuanian Bioethics | Asta Cekanauskaite, PhD |
|  |  | komitetas | Committee | Algirdo Str. 31 (II floor), |
|  |  |  |  | 03219 Vilnius, Lithuania |
|  | **POLAND** |  |  |  |
|  | All | Komisja Bioetyczna | Ethics Committee at | Prof. PhD Józef Drzewoski, |
|  |  | przy Uniwersytecie | Medical University in | MD |
|  |  | Medycznym w Lodzi | Łódź | Pl. Jozefa Hallera 1B, |
|  |  |  |  | II floor, room no. 230, |
|  |  |  |  | 90-647 Lodz, Poland |
|  | **SLOVAKIA** | |  |  |
|  | All | Etická komisia | Ethics Committee of | MUDr. René Hakó, PhD., |
| 407 | | Košického | the self-governing | MHA, MPH, MBA |
|  |  | samosprávneho kraja | region of Košice | Námestie Maratónu mieru 1 |
|  |  |  |  | 042 66 Košice, Slovakia |
| 403 | | Etická komisia | Ethics Committee of | JUDr. Lýdia Budziňáková |
|  |  | Prešovského | the self-governing | Námestie mieru 2 |
|  |  | samosprávneho kraja | region of Prešov | 080 01 Prešov, Slovakia |
| 404 | | Etická komisia | Ethics Committee of | MUDr. Rastislav Gajdoš |
|  |  | Trnavského | the self-governing | Starohájska 10 |
|  |  | samosprávneho kraja | region of Trnava | 917 01 Trnava, Slovakia |
| 405 | | Etická komisia | Ethics Committee of | MUDr. Juraj Štekláč, PhD., |
|  |  | Bratislavského | the self-governing | MPH |
|  |  | samosprávneho kraja | region of Bratislava | Sabinovská ul. 16 |
|  |  |  |  | 820 05 Bratislava 25, Slovakia |
| 406 | | Etická komisia | Ethics Committee of | MUDr. Ondrej Šedivý |
|  |  | Nitrianskeho | the self-governing | Rázusova 2A |
|  |  | samosprávneho kraja | region of Nitra | 949 01 Nitra, Slovakia |
| 408 | | Nezávislá etická | Independent Ethics | MUDr. Karol Mičko |
|  |  | komisia | Committee of the | Námestie SNP 23 |
|  |  | Banskobystrického | self-governing region | 974 01 Banská Bystrica, |
|  |  | samosprávneho kraja | of Banská Bystrica | Slovakia |

|  | **Site**  **number** | **EC name original** | **EC name English** | **Chair person and EC address** |
| --- | --- | --- | --- | --- |
|  |
|  | **UKRAINE** | |  |  |
| 502 | | Комісія з питань етики | Commission on | Mr. Fomenko O.I. |
|  |  | при Медичному центрі | ethics questions at | Av. Nauky, 77 |
|  |  | товариства з | Medical center | 61103 Kharkiv, Ukraine |
|  |  | обмеженою | “Research Medical |  |
|  |  | відповідальністю | Center - Your |  |
|  |  | «Науковий медичний | Doctor” LTD |  |
|  |  | центр – Ваш лікар» |  |  |
| 503 | | Комісія з питань етики | Сommission on | Mrs. Podvigina T.V. |
|  |  | при Комунальному | ethics questions at | Batumska, 13 |
|  |  | некомерційному | Communal non-profit | 49074 Dnipro, Ukraine |
|  |  | підприємстві «Міська | enterprise "City |  |
|  |  | клінічна лікарня №6» | Clinical Hospital |  |
|  |  | Дніпровської міської | №6" of Dnipro City |  |
|  |  | ради | Council |  |
| 504 | | Комісія з питань етики | Commission on | Mrs. Melchina L.I. |
|  |  | при Комунальному | ethics questions at | 65 Volodymyra Antonovycha |
|  |  | некомерційному | Communal non-profit | street |
|  |  | підприємстві | enterprise "Clinical | 49006, Dnipro, Ukraine |
|  |  | «Клінічна лікарня | Hospital of |  |
|  |  | швидкої медичної | Emergency Medical |  |
|  |  | допомоги» | Care" of Dnipro City |  |
|  |  | Дніпровської міської | Council |  |
|  |  | ради |  |  |
| 505 | | Комісія з питань етики | Commission on | Mr. Matviyenko Yu.P. |
|  |  | при Комунальному | Ethics Questions at | 27A Olesya Gonchara street, |
|  |  | підприємстві «1-а | Communal Institution | 36038 Poltava, Ukraine |
|  |  | міська клінічна | “1-st City Clinical |  |
|  |  | лікарня Полтавської | Hospital of Poltava |  |
|  |  | міської ради» | City Council” |  |
| 508 | | Комісія з питань етики | Commission on | Mr. Melnyk V.M. |
|  |  | при Державній | ethics questions at SI | 10 Amosova street |
|  |  | установі | “National institute of | 03680 Kyiv, Ukraine |
|  |  | «Національний | phthisiology and |  |
|  |  | інститут фтизіатрії і | pulmonology named |  |
|  |  | пульмонології ім. Ф.Г. | after F. G. Yanovskyi |  |
|  |  | Яновського | of National Academy |  |
|  |  | Національної академії | of Medical Sciences |  |
|  |  | медичних наук | of Ukraine” |  |
|  |  | України» |  |  |

**Table S2.** Schedule of trial procedures.

|  | **Screening** | | **Treatment phase** | | | | | **Follow-up** | |
| --- | --- | --- | --- | --- | --- | --- | --- | --- | --- |
| **Visit No.** | **V1a** | **V1b*** | **V2a** | **V2b** | **V3a** | **V3b** | **V4a/**  **EDVa** | **V4b/**  **EDVb*** | **V5** |
| Day | Day -7  (±2) | Up to 2  days  after  V1a | Day 1 | Day 15  (±2) | Day 29  (±2) | Day 43  (±2) | Day 57  (±2) | Up to 2  days after  V4a/  EDVa | 7±2 days  after V4a |
| *Week* |  |  | *Baseline* | *2* | *4* | *6* | *8* |  | *9* |
| In-house visit (IH)/ telephone contact (T) | (IH) | (IH) | (IH) | (T) | (IH) | (T) | (IH) | (IH) | (T) |
| Informed consent | ⚫ |  |  |  |  |  |  |  |  |
| Demographics/baseline characteristics | ⚫ |  |  |  |  |  |  |  |  |
| Medical history | ⚫ |  |  |  |  |  |  |  |  |
| Skin prick testa | ⚫ |  |  |  |  |  |  |  |  |
| Prior medication | ⚫ |  |  |  |  |  |  |  |  |
| Concomitant medication | ⚫ |  | ⚫ | ⚫ | ⚫ | ⚫ | ⚫ |  | ⚫ |
| Inclusion/exclusion criteria | ⚫ |  | ⚫ |  |  |  |  |  |  |
| Randomization |  |  | ⚫ |  |  |  |  |  |  |
| Environmental allergic factors assessment | ⚫ |  | ⚫ |  | ⚫ |  | ⚫ |  |  |
| Adverse events (TEAEs or n-TEAEs) | ⚫ | ⚫c | ⚫ | ⚫ | ⚫ | ⚫ | ⚫ | ⚫c | ⚫ |
| Blood withdrawal (hematology and biochemistry; hCG2) | ⚫ |  |  |  |  |  | ⚫ |  |  |
| Urine pregnancy testb |  |  | ⚫ |  | ⚫ |  |  |  |  |
| On-site drug administration |  |  | ⚫ |  | ⚫ |  | ⚫g |  |  |
| Peak ocular discomfort scored |  |  | ⚫ |  | ⚫ |  | ⚫g |  |  |
| Ocular tolerabilitye |  |  | ⚫ |  | ⚫ |  | ⚫g |  |  |
| E-diaryf | ⚫ |  | ⚫ |  | ⚫ |  | ⚫ |  |  |
| Dispense drug |  |  | ⚫ |  | ⚫ |  |  |  |  |
| Drug accountability |  |  |  |  | ⚫ |  | ⚫ |  |  |
| Best-corrected visual acuity |  | ⚫ |  |  |  |  |  | ⚫ |  |
| Slit-lamp biomicroscopy |  | ⚫ |  |  |  |  |  | ⚫ |  |
| Intraocular pressure |  | ⚫ |  |  |  |  |  | ⚫ |  |
| Dilated fundus examination |  | ⚫ |  |  |  |  |  | ⚫ |  |

*EDV = early discontinuation visit; hCG = human chorionic gonadotropin; TEAEs = treatment-emergent adverse events; n-TEAEs = non-treatment emergent adverse events*

* Assessments of Visit 1b and Visit 4b/EDVb were performed by an ophthalmologist. Assessments of Visit 1a and

Visit 1b as well as Visit 4a/EDVa and Visit 4b/EDVb might be performed on the same day.

a Only to be performed if no documented positive skin prick test and/ or positive validated IgE test to perennial

and/or seasonal allergens, performed within 6 months before Visit 1a, was available.

b Only in women of childbearing potential.

c  Not applicable in case Visit 1b was combined with Visit 1a or Visit 4b/EDVb is combined with Visit 4a/EDVa,

respectively.

d Ocular discomfort was to be assessed for each eye by the patients on an 11-point numeric rating scale (from 0 to

10) immediately upon instillation, at 1 minute and 5 minutes after drop instillation.

e Ocular burning, stinging, tearing, blurring, and stickiness, was to be assessed for each eye by the patient 3 minutes

after instillation on an 11-point numeric rating scale (from 0 to 10).

f During Visit 1a, access to a web-based electronic patient diary (e-diary) was to be provided and its use was to be explained. The patient was to document once daily for each eye in the e-diary (prior to Visit 2a in the evening at approximately the same time; at Visit 2a and thereafter: 12 (±2) hours after eye drop instillation) the following signs and symptoms of his/her allergic conjunctivitis: ocular itching, redness and tearing separately. Additionally, bilastine intake was to be document (yes/no, if yes time has to be documented).

g Not applicable at EDV.
